# Supplementary material for: Controlling Pt nanoparticle sintering by sub-monolayer MgO ALD thin films
Source: Royal Society of Chemistry journal article supplement (doi:10.1039/d3nr05884k), 2024-01-01
Supplement: d3nr05884k1.pdf [file d3nr05884k1.pdf]

## Supplementary Information

### Controlling Pt Nanoparticle Sintering by Sub-Monolayer MgO ALD

#### Thin Films

Zhiwei Zhang,<sup>[a]</sup> Matthias Filez,<sup>[a,b]</sup> Eduardo Solano,<sup>[c]</sup> Nithin Poonkottil,<sup>[a]</sup> Jin Li,<sup>[a]</sup>  
Matthias M. Minjauw,<sup>[a]</sup> Hilde Poelman,<sup>[d]</sup> Martin Rosenthal,<sup>[e]</sup> Philipp Brüner,<sup>[f]</sup>  
Vladimir V. Galvita,<sup>[d]</sup> Christophe Detavernier,<sup>[a]</sup> Jolien Dendooven\*<sup>[a]</sup>

<sup>[a]</sup> Z. Zhang, Dr. M. Filez, Dr N. Poonkottil, Dr. J. Li, Dr. M. M. Minjauw, Prof. C. Detavernier, Prof. J. Dendooven  
Conformal Coating of Nanomaterials (CoCooN)  
Department of Solid State Sciences  
Ghent University  
Krijgslaan 281/S1, 9000 Ghent (Belgium)  
\* e-mail: [Jolien.Dendooven@UGent.be](mailto:Jolien.Dendooven@UGent.be)

<sup>[b]</sup> Dr. M. Filez  
Centre for Membrane Separations Adsorption Catalysis and Spectroscopy for Sustainable Solutions (cMACS)  
KU Leuven  
Celestijnenlaan 200F, 3001 Leuven (Belgium)

<sup>[c]</sup> Dr. E. Solano  
NCD-SWEET beamline  
ALBA synchrotron light source  
Carrer de la Llum 2-26, 08290, Cerdanyola del Vallès (Spain)

<sup>[d]</sup> Laboratory for Chemical Technology  
Ghent University  
Technologiepark 125, 9052 Ghent (Belgium)

<sup>[e]</sup> Dr. M. Rosenthal  
DUBBLE beamline  
ESRF - The European Synchrotron  
71 Avenue des Martyrs, 38000 Grenoble (France)

<sup>[f]</sup> P. Brüner  
IONTOF Technologies GmbH  
Heisenbergstr. 15, 48149 Muenster (Germany)

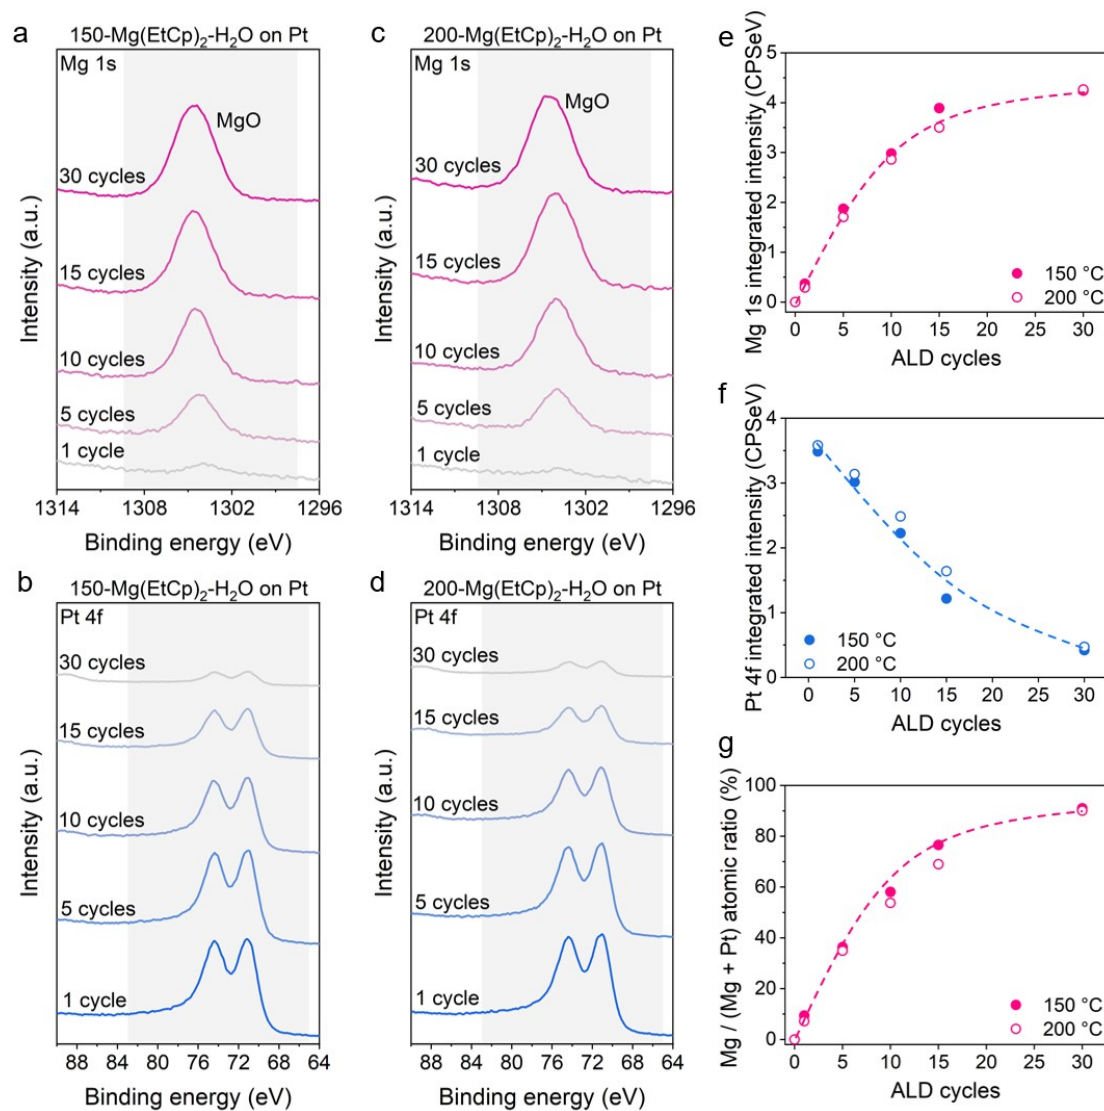

**Figure S1.** XPS spectra recorded after 1, 5, 10, 15 and 30 ALD cycles of the Mg(EtCp)<sub>2</sub>-H<sub>2</sub>O process on a sputtered Pt substrate. The binding energy scale is calibrated by taking Pt 4f<sub>5/2</sub> at 70.9 eV. The background type is Tougaard for Mg 1s and Shirley for Pt 4f, respectively. (a) Mg 1s and (b) Pt 4f spectra for the samples prepared at 150 °C. (c) Mg 1s and (d) Pt 4f spectra for the samples prepared at 200 °C. (e) Mg 1s peak intensity integrated in the region from 1310 eV to 1298 eV and (f) Pt 4f peak intensity integrated in the region from 83 eV to 65 eV as a function of the number of ALD cycles for both deposition temperatures. (g) Mg atomic fraction as a function of the number of ALD cycles for both deposition temperatures. The dashed lines serve as guides to the eye. The Mg atomic fraction is determined by dividing the peak area of the Mg 1s signal by the summed areas of the Mg 1s and Pt 4f signals, taking into account the relative sensitivity factors of both photoemission peaks.

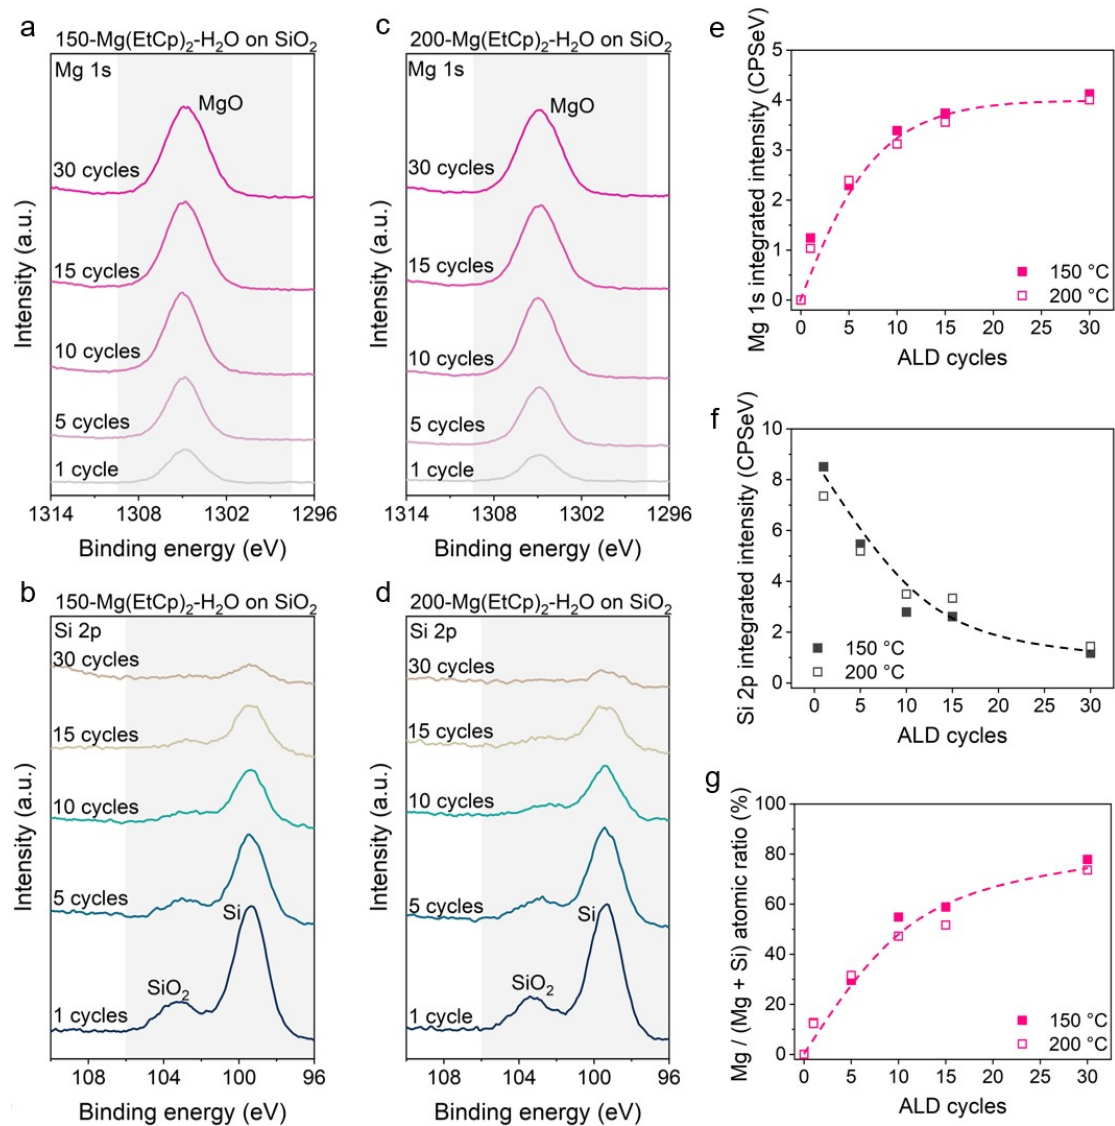

**Figure S2.** XPS spectra recorded after 1, 5, 10, 15 and 30 ALD cycles of the Mg(EtCp)<sub>2</sub>-H<sub>2</sub>O process on a native SiO<sub>2</sub> substrate. The binding energy scale is calibrated by taking Si 2p<sub>3/2</sub> at 99.4 eV. The background type is Tougaard for Mg 1s and Linear for Si 2p, respectively. (a) Mg 1s and (b) Si 2p spectra for the samples prepared at 150 °C. (c) Mg 1s and (d) Si 2p spectra for the samples prepared at 200 °C. (e) Mg 1s peak intensity integrated in the region from 1310 eV to 1298 eV and (f) Si 2p peak intensity integrated in the region from 106 eV to 96 eV as a function of the number of ALD cycles for both deposition temperatures. (g) Mg atomic fraction as a function of the number of ALD cycles for both deposition temperatures. The dashed lines serve as guides to the eye. The Mg atomic fraction is determined by dividing the peak area of the Mg 1s signal by the summed areas of the Mg 1s and Si 2p signals, taking into account the relative sensitivity factors of both photoemission peaks.

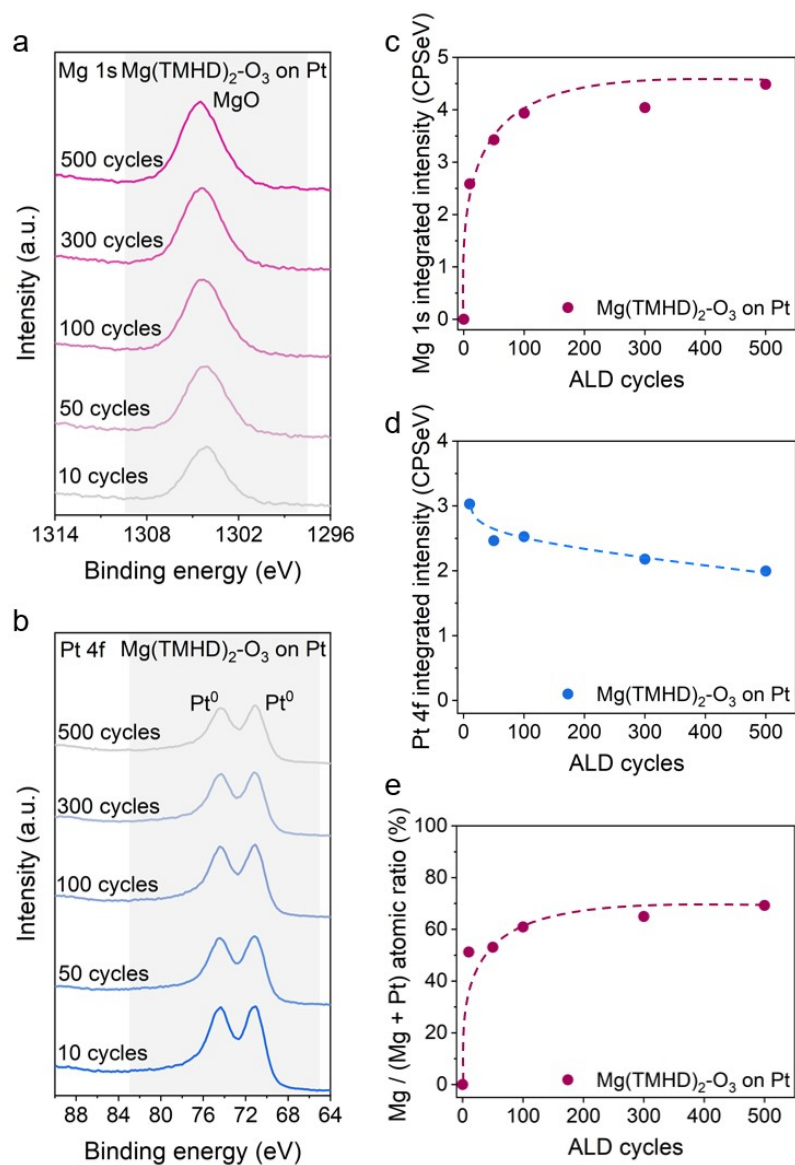

**Figure S3.** XPS spectra recorded after 10, 50, 100, 300 and 500 ALD cycles of the  $\text{Mg(TMHD)}_2\text{-O}_3$  process at 250 °C on sputtered Pt substrate. The binding energy scale is calibrated by taking  $\text{Pt } 4f_{5/2}$  at 70.9 eV. The background type is Tougaard for Mg 1s and Shirley for Pt 4f, respectively. (a) Mg 1s and (b) Pt 4f spectra. (c) Mg 1s peak intensity integrated in the region from 1310 eV to 1298 eV and (d) Pt 4f peak intensity integrated in the region from 83 eV to 65 eV as a function of the number of ALD cycles. (e) Mg atomic fraction as a function of the number of ALD cycles. The dashed lines serve as guides to the eye. The Mg atomic fraction is determined by dividing the peak area of the Mg 1s signal by the summed areas of the Mg 1s and Pt 4f signals, taking into account the relative sensitivity factors of both photoemission peaks.

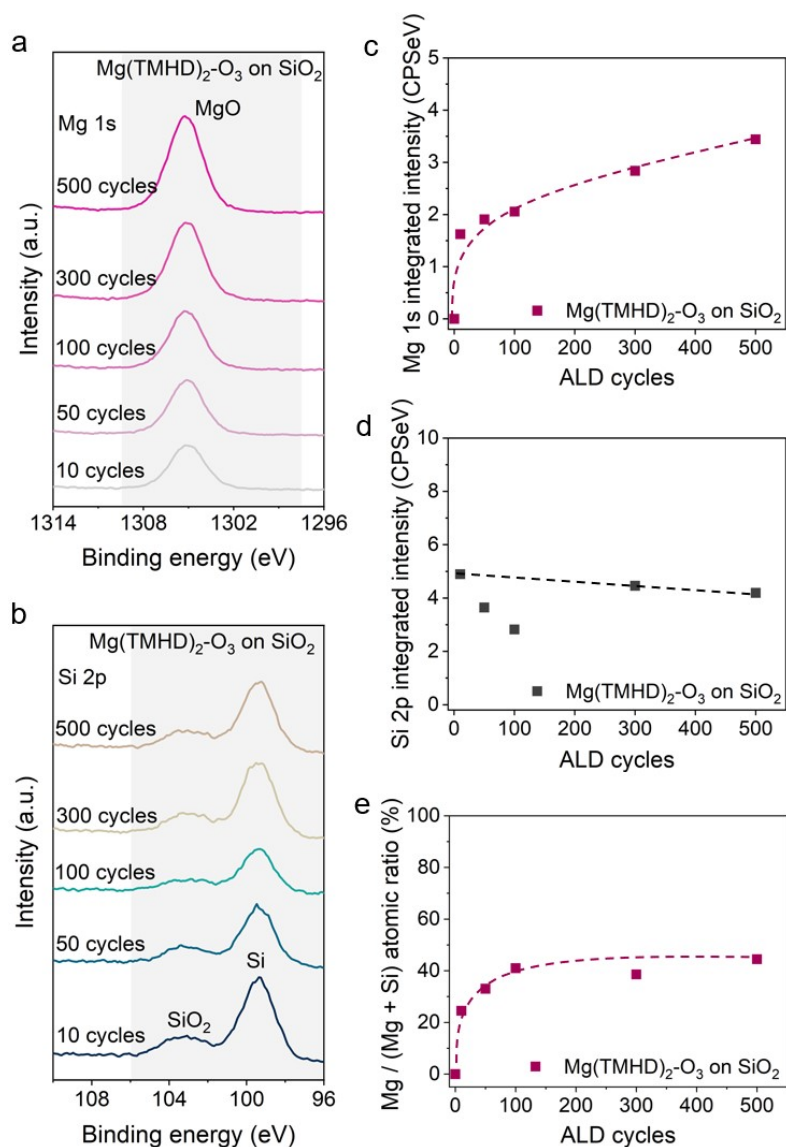

**Figure S4.** XPS spectra recorded after 10, 50, 100, 300 and 500 ALD cycles of the Mg(TMHD)<sub>2</sub>-O<sub>3</sub> process at 250 °C on native SiO<sub>2</sub> substrate. The binding energy scale is calibrated by taking Si 2p<sub>3/2</sub> at 99.4 eV. The background type is Tougaard for Mg 1s and Linear for Si 2p, respectively. (a) Mg 1s and (b) Si 2p spectra. (c) Mg 1s peak intensity integrated in the region from 1310 eV to 1298 eV and (d) Si 2p peak intensity integrated in the region from 106 eV to 96 eV as a function of the number of ALD cycles. (e) Mg atomic fraction as a function of the number of ALD cycles. The dashed lines serve as guides to the eye. The Mg atomic fraction is determined by dividing the peak area of the Mg 1s signal by the summed areas of the Mg 1s and Si 2p signals, taking into account the relative sensitivity factors of both photoemission peaks.

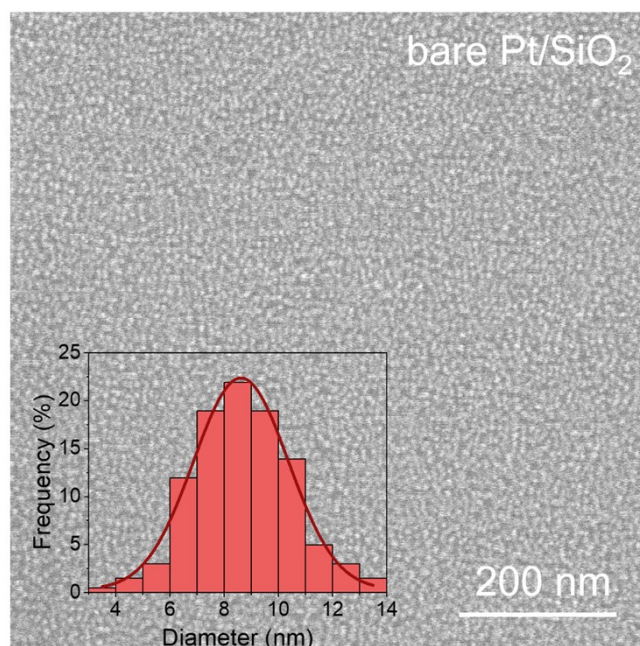

**Figure S5.** SEM image of Pt NPs on a native SiO<sub>2</sub> substrate, prepared by 25 ALD cycles of the MeCpPtMe<sub>3</sub>/O<sub>2</sub> process at 300 °C. This sample is labeled as bare Pt/SiO<sub>2</sub> throughout the manuscript. The contrast and brightness of the image is optimized using the *ImageJ* software. A region with ca. 200 particles is selected and their sizes are measured and represented in a size distribution diagram (the inset).

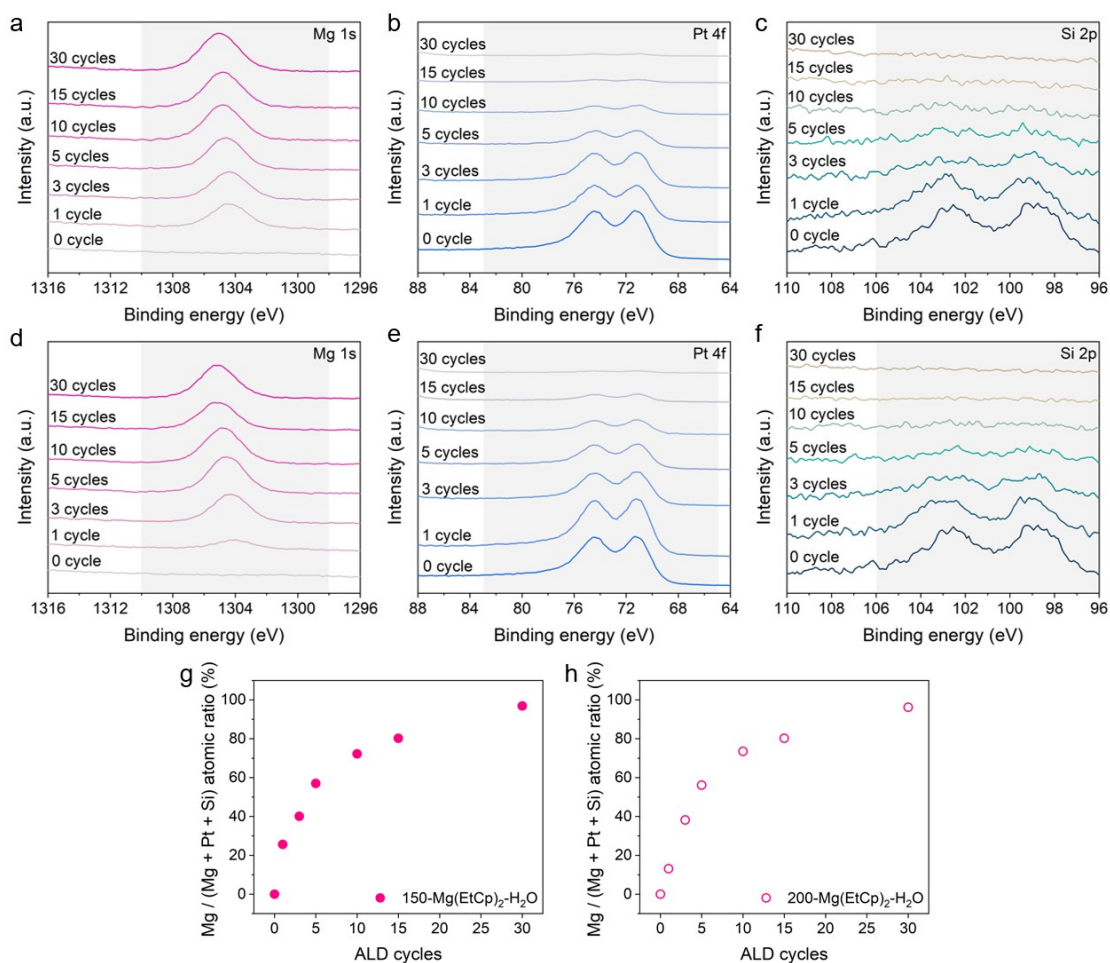

**Figure S6.** XPS spectra recorded after 0, 1, 3, 5, 10, 15 and 30 ALD cycles of the  $\text{Mg}(\text{EtCp})_2\text{-H}_2\text{O}$  process on  $\text{Pt}/\text{SiO}_2$ . The binding energy scale is calibrated by taking  $\text{Pt } 4f_{5/2}$  at 70.9 eV. The background type is Tougaard for Mg 1s, Shirley for Pt 4f and Linear for Si 2p, respectively. Mg 1s peak intensity is integrated in the region from 1310 eV to 1298 eV. Pt 4f peak intensity is integrated in the region from 83 eV to 65 eV. Si 2p peak intensity integrated in the region from 106 eV to 96 eV. (a) Mg 1s, (b) Pt 4f and (c) Si 2p spectra for the samples prepared at 150 °C. (d) Mg 1s, (e) Pt 4f and (f) Si 2p spectra for the samples prepared at 200 °C. (g,h) Mg atomic fraction as a function of the number of ALD cycles for both deposition temperatures: (g) 150 °C and (h) 200 °C. The Mg atomic fraction is determined by dividing the peak area of the Mg 1s signal by the summed areas of the Mg 1s, Pt 4f and Si 2p signals, taking into account the relative sensitivity factors of the three photoemission peaks.

150-Mg(EtCp)<sub>2</sub>-H<sub>2</sub>O

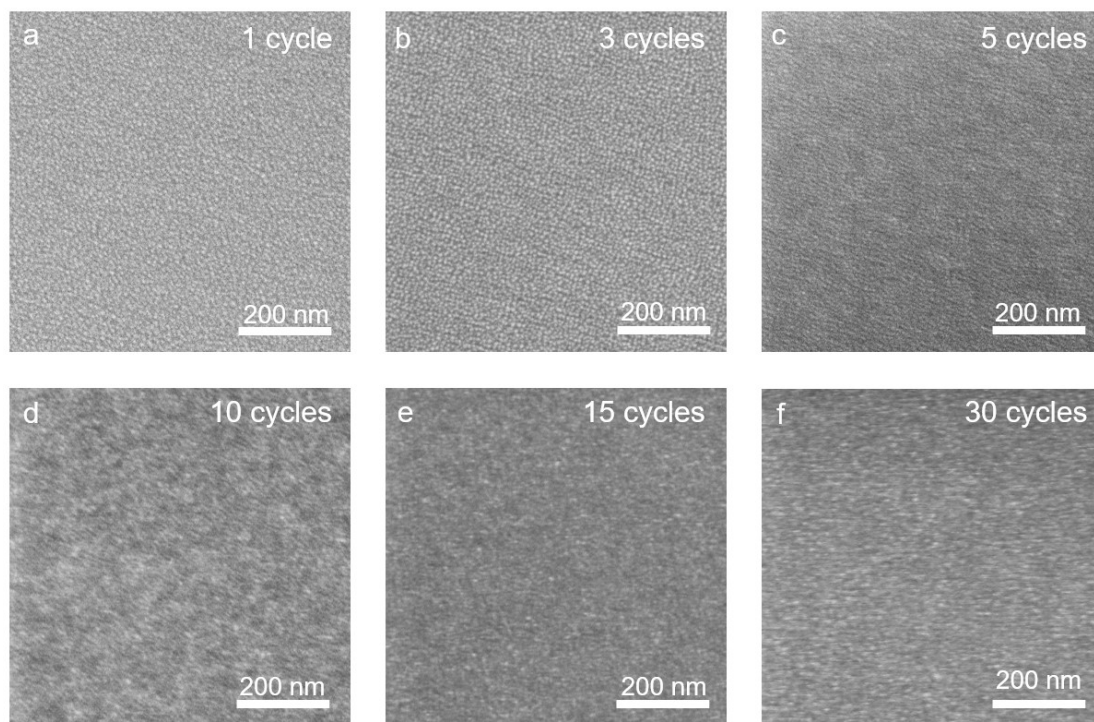

**Figure S7.** SEM images of Pt/SiO<sub>2</sub> overcoated with MgO using (a) 1, (b) 3, (c) 5, (d) 10, (e) 15 and (f) 30 ALD cycles of the Mg(EtCp)<sub>2</sub>-H<sub>2</sub>O process at 150 °C.



200-Mg(EtCp)<sub>2</sub>-H<sub>2</sub>O

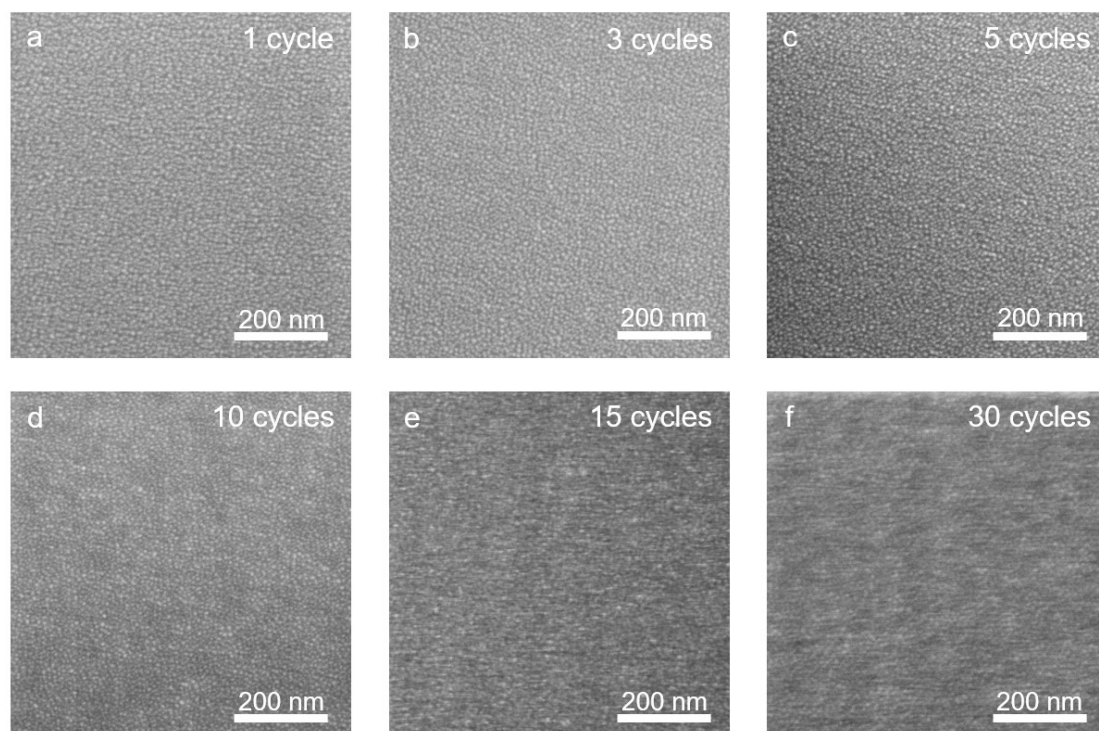

**Figure S8.** SEM images of Pt/SiO<sub>2</sub> overcoated with MgO using (a) 1, (b) 3, (c) 5, (d) 10, (e) 15 and (f) 30 ALD cycles of the Mg(EtCp)<sub>2</sub>-H<sub>2</sub>O process at 200 °C.

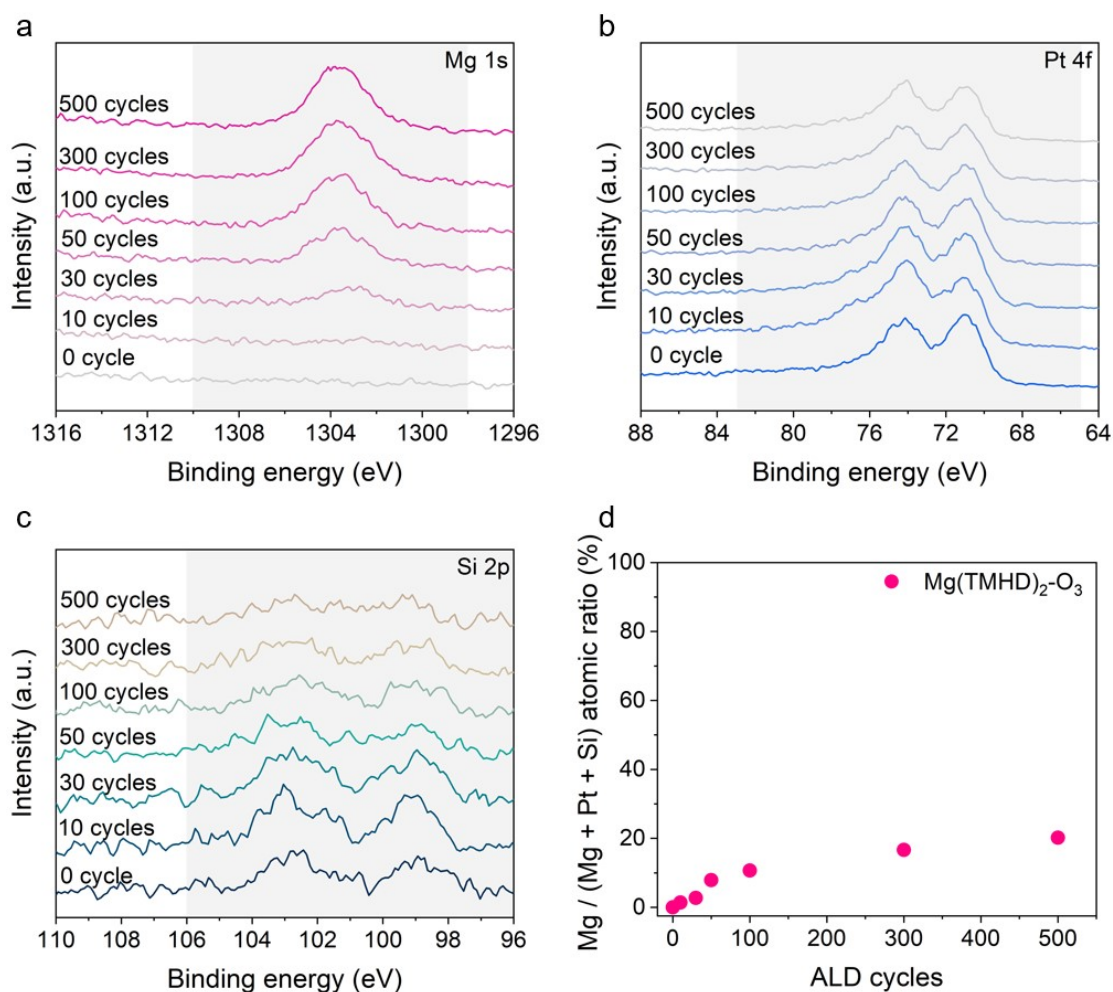

**Figure S9.** XPS spectra recorded after 0, 10, 30, 50, 100, 300 and 500 ALD cycles of the Mg(TMHD)<sub>2</sub>-O<sub>3</sub> process at 250 °C on Pt/SiO<sub>2</sub>. The binding energy scale is calibrated by taking Pt 4f<sub>5/2</sub> at 70.9 eV. The background type is Tougaard for Mg 1s, Shirley for Pt 4f and Linear for Si 2p, respectively. Mg 1s peak intensity is integrated in the region from 1310 eV to 1298 eV. Pt 4f peak intensity is integrated in the region from 83 eV to 65 eV. Si 2p peak intensity is integrated in the region from 106 eV to 96 eV. (a) Mg 1s, (b) Pt 4f and (c) Si 2p spectra. (d) Mg atomic fraction as a function of the number of ALD cycles. The Mg atomic fraction is determined by dividing the peak area of the Mg 1s signal by the summed areas of the Mg 1s, Pt 4f and Si 2p signals, taking into account the relative sensitivity factors of the three photoemission peaks.

Mg(TMHD)<sub>2</sub>-O<sub>3</sub>

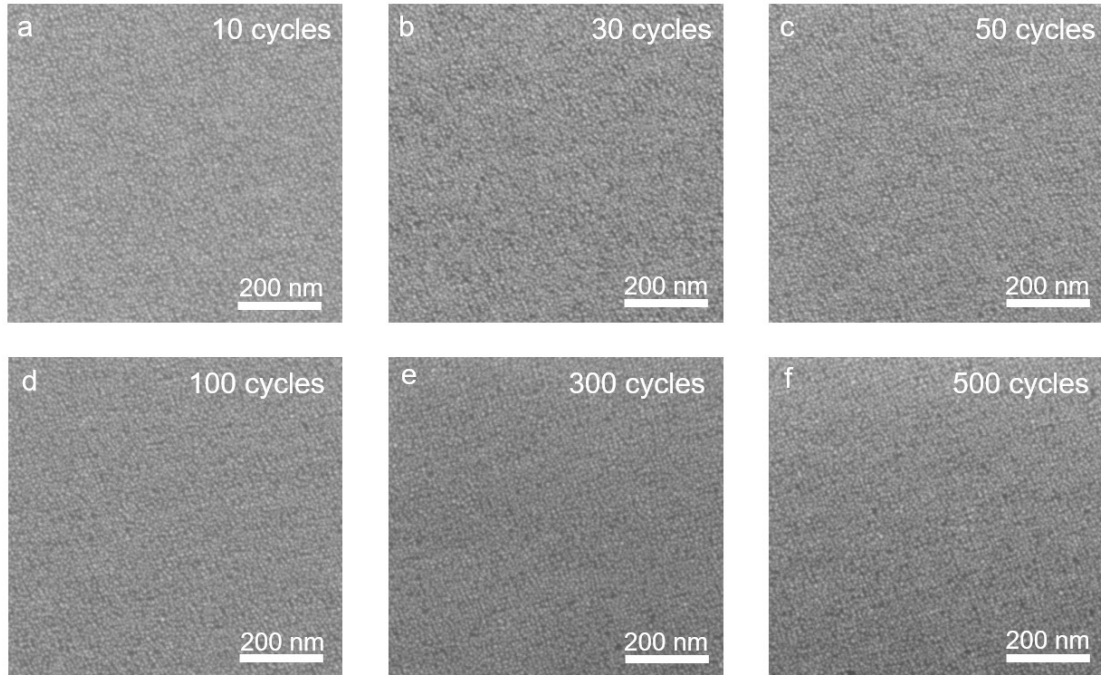

**Figure S10.** SEM images of Pt/SiO<sub>2</sub> overcoated with MgO using (a) 10, (b) 30, (c) 50, (d) 100, (e) 300 and (f) 500 ALD cycles of the Mg(TMHD)<sub>2</sub>-O<sub>3</sub> process at 250 °C.

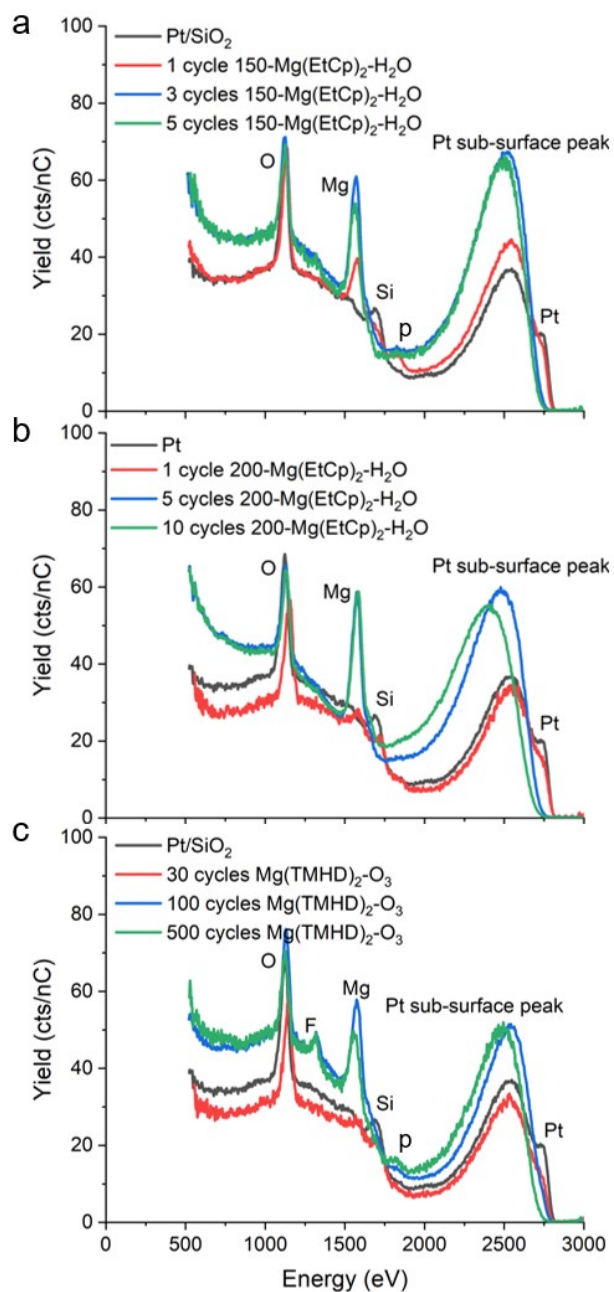

**Figure S11.** 3 keV He<sup>+</sup> LEIS spectra of Pt/SiO<sub>2</sub> without and with MgO overcoat, deposited with the Mg(EtCp)<sub>2</sub>-H<sub>2</sub>O ALD process at (a) 150 °C and (b) 200 °C, and (c) with the Mg(TMHD)<sub>2</sub>-O<sub>3</sub> process at 250 °C.

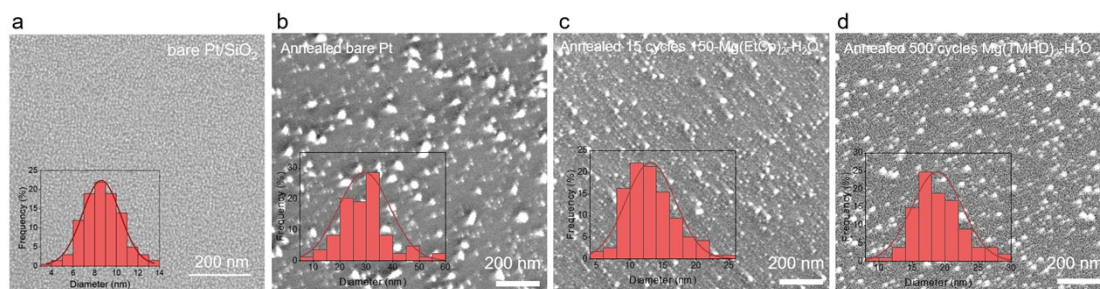

**Figure S12.** SEM images and corresponding size distribution diagrams of (a) bare Pt without annealing treatment, (b) bare Pt after 800 °C ramp annealing, (c) 15 cycles 150-Mg(EtCp)<sub>2</sub>·H<sub>2</sub>O after 800 °C ramp annealing and (d) 500 cycles Mg(TMHD)<sub>2</sub>·O<sub>3</sub> after 800 °C ramp annealing.

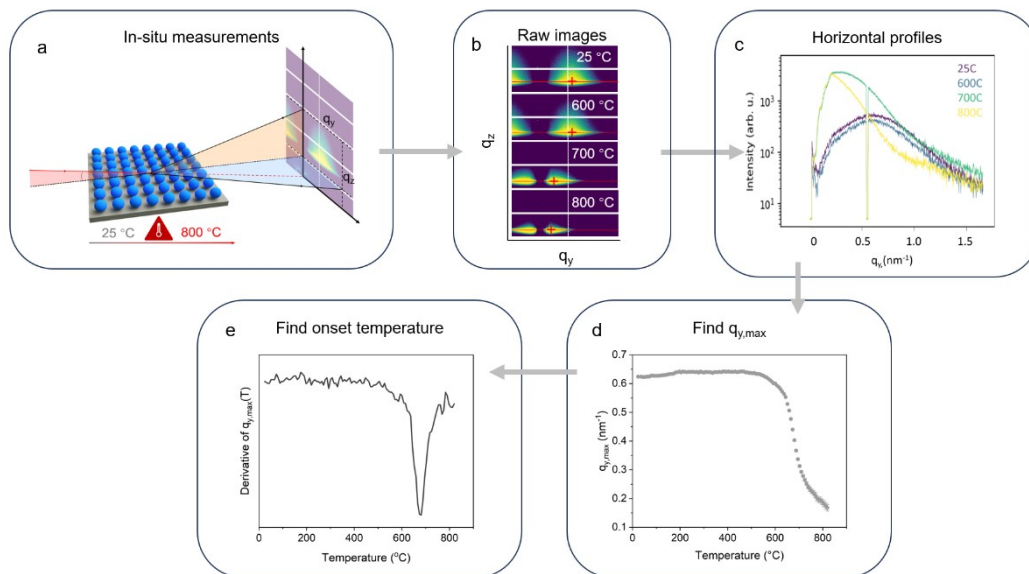

**Figure S13.** Schematic of the GISAXS geometry (a) and data analysis workflow (b-e). (b) Experimental 2D GISAXS patterns. (c) A 1D horizontal profile is extracted from the 2D image at the Si Yoneda peak (indicated by the red lines in (b)). (d) Fitting of a Gaussian function to the scattering peak in the 1D profiles yields the  $q_y$  position of the peak maximum,  $q_{y,max}$ , at each temperature. (e) The derivative of the  $q_{y,max}$ (temperature) curve shows a distinct minimum. The temperature at which this minimum occurs, is interpreted as the onset temperature for particle sintering.

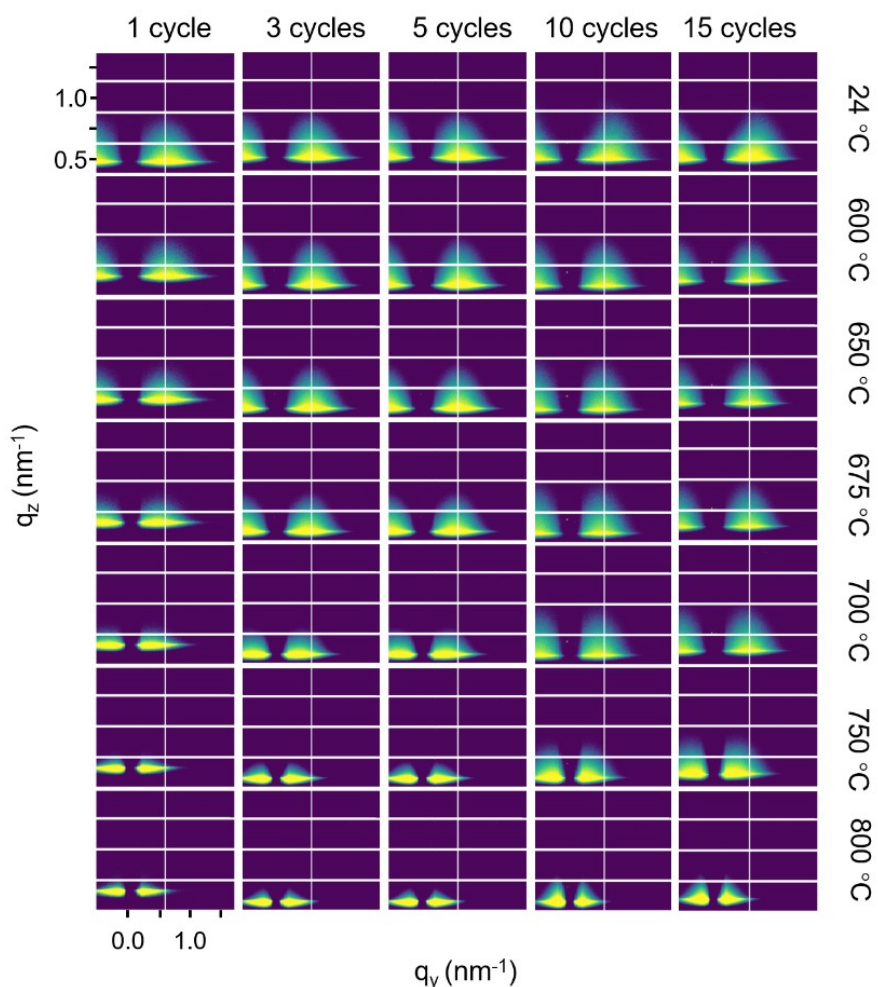

**Figure S14.** Selection of 2D GISAXS patterns recorded during in-situ O<sub>2</sub> anneals of Pt/SiO<sub>2</sub> with different MgO overlayers, prepared by 1, 3, 5, 10 and 15 Mg(EtCp)<sub>2</sub>-H<sub>2</sub>O ALD cycles at 150 °C, respectively. Going from top to bottom in the first column of the figure, the scattering features move closer together and the intensity around  $q_y = 0 \text{ nm}^{-1}$  increases, indicative of NP sintering with increasing temperature. With increasing number of ALD cycles, the movement of the scattering peaks is delayed to higher temperatures, implying a delay in sintering and hence enhanced thermal stability of the Pt NPs.

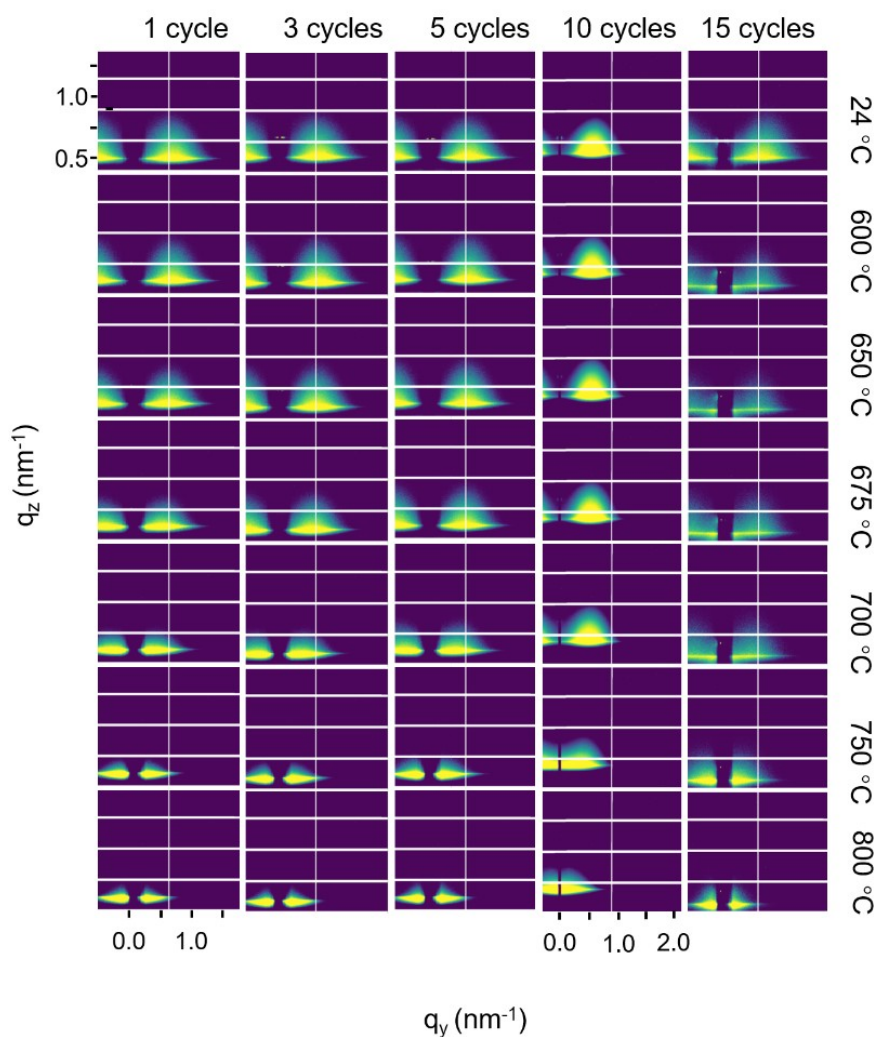

**Figure S15.** Selection of 2D GISAXS patterns recorded during in-situ  $O_2$  anneals of Pt/SiO<sub>2</sub> with different MgO overlayers, prepared by 1, 3, 5, 10 and 15 Mg(EtCp)<sub>2</sub>-H<sub>2</sub>O ALD cycles at 200 °C, respectively. Going from top to bottom in the first column of the figure, the scattering features move closer together and the intensity around  $q_y = 0 \text{ nm}^{-1}$  increases, indicative of NP sintering with increasing temperature. With increasing number of ALD cycles, the movement of the scattering peaks is delayed to higher temperatures, implying a delay in sintering and hence enhanced thermal stability of the Pt NPs.



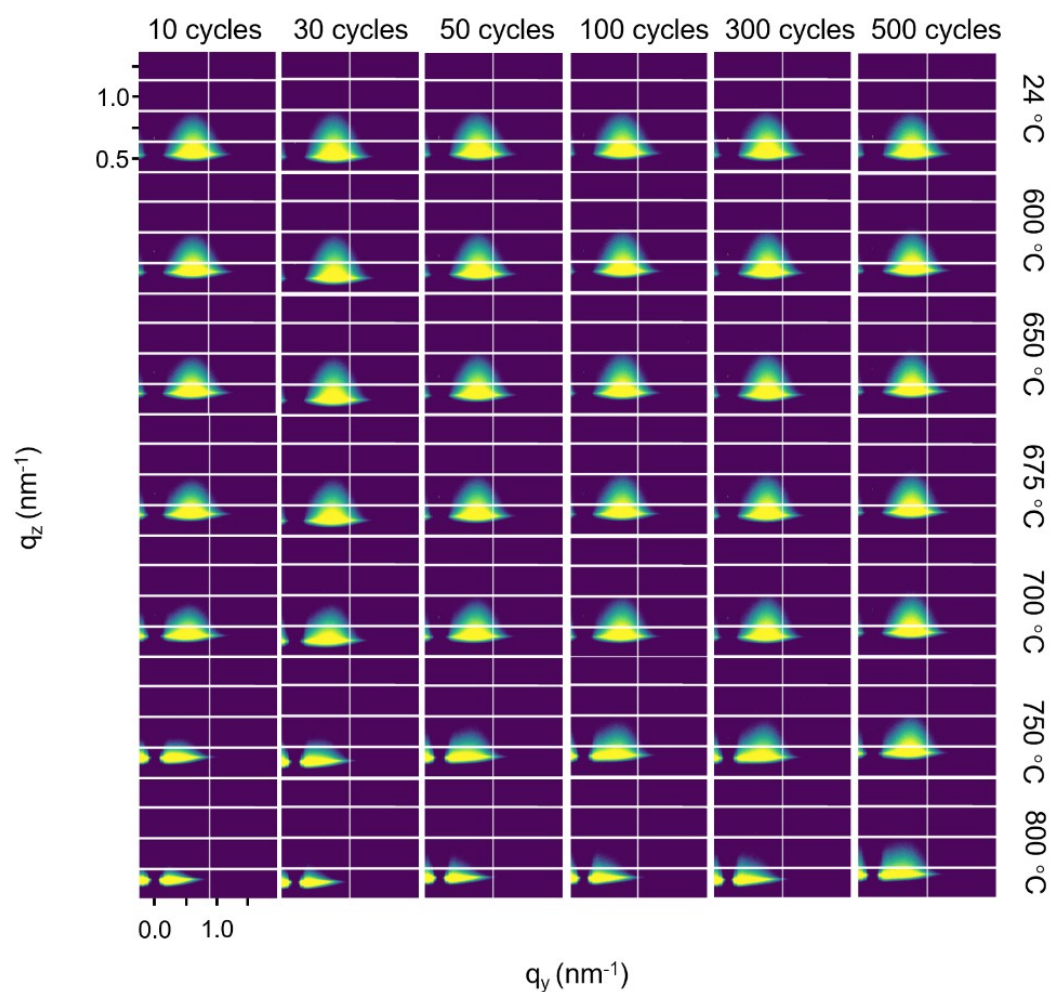

**Figure S16.** Selection of 2D GISAXS patterns recorded during in-situ  $O_2$  anneals of Pt/SiO<sub>2</sub> with different MgO overlayers, prepared by 10, 30, 50, 100, 300 and 500 Mg(TMHD)<sub>2</sub>-O<sub>3</sub> ALD cycles, respectively. Going from top to bottom in the first column of the figure, the scattering features move closer together and the intensity around  $q_y = 0 \text{ nm}^{-1}$  increases, indicative of NP sintering with increasing temperature. With increasing number of ALD cycles, the movement of the scattering peaks is delayed to higher temperatures, implying a delay in sintering and hence enhanced thermal stability of the Pt NPs.

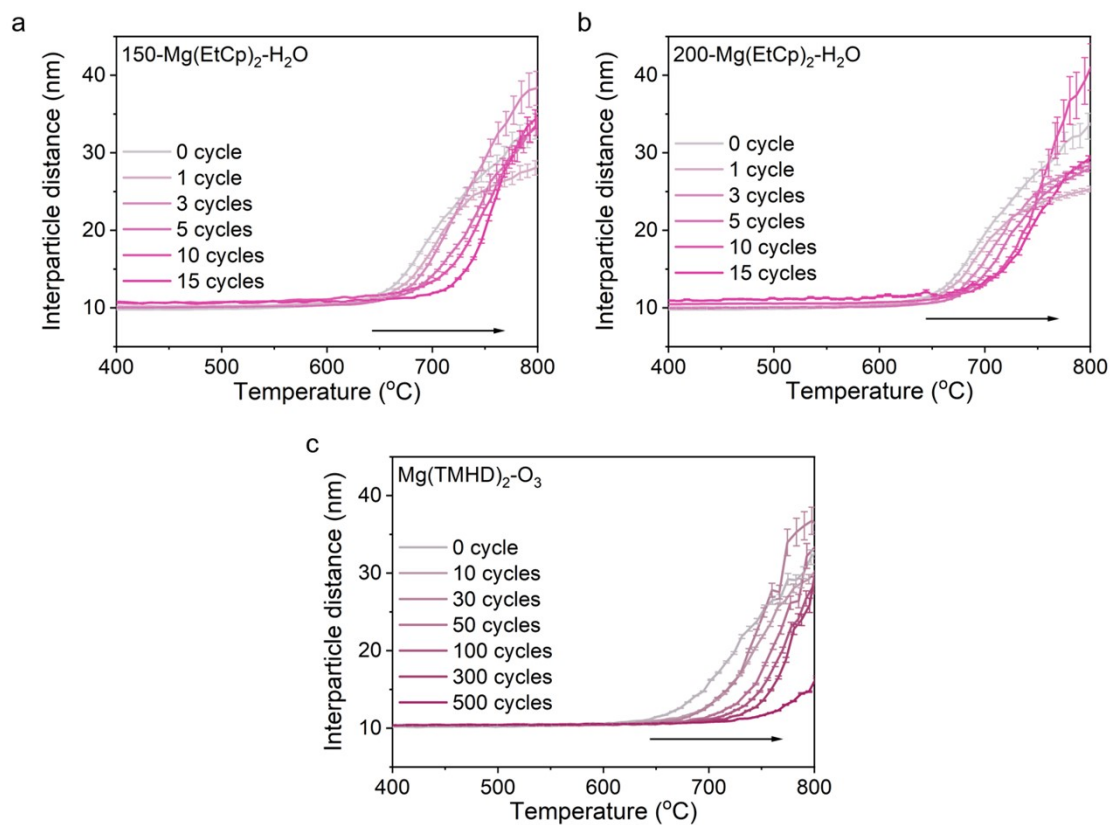

**Figure S17.** Evolution of the center-to-center NP distance with temperature in the range 400-800 °C during O<sub>2</sub> anneals of Pt/SiO<sub>2</sub> with different MgO overlayers, prepared by 1, 3, 5, 10 and 15 Mg(EtCp)<sub>2</sub>-H<sub>2</sub>O ALD cycles at (a) 150 °C and (b) 200 °C, and (c) Pt/SiO<sub>2</sub> with different MgO overlayers, prepared by 10, 30, 50, 100, 300 and 500 Mg(TMHD)<sub>2</sub>-O<sub>3</sub> ALD cycles at 250 °C. The interparticle distance (*D*) is obtained from the data in Figures 5a-c by applying the relation  $D = 2\pi/q_{y,max}$ .

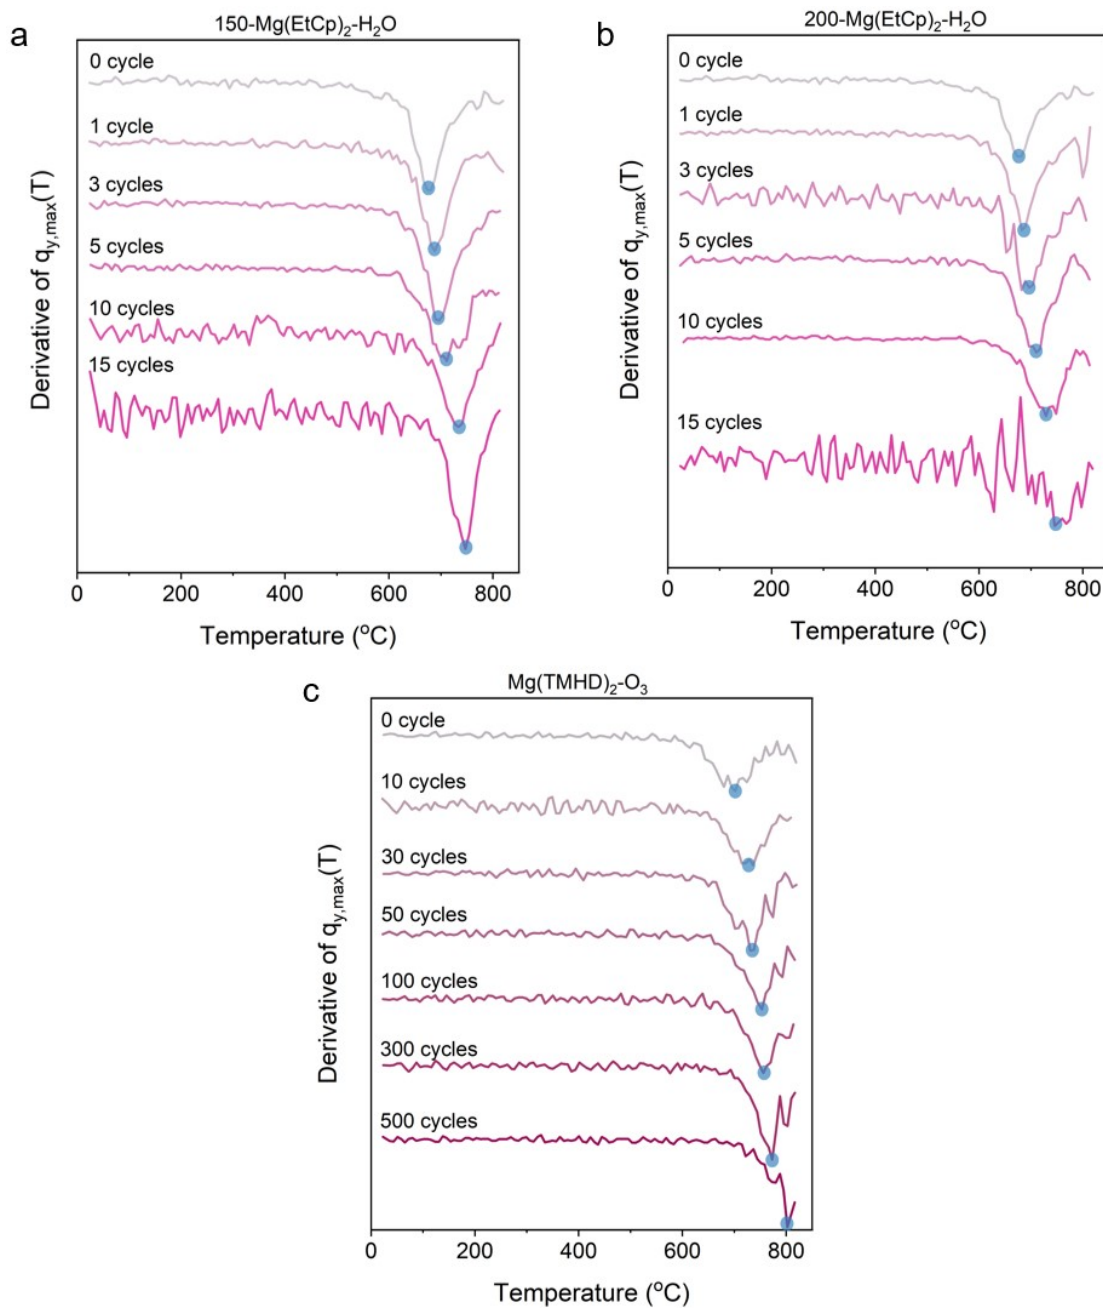

**Figure S18.** First derivative of the  $q_{y,max}$  vs. temperature curves in Figure 5a-c, showing a distinct minimum marked by the blue dots. The temperature at which this minimum occurs, is interpreted as the onset temperature for particle sintering. The onset temperature is plotted as a function of the number of ALD cycles in Figure 5d-f.

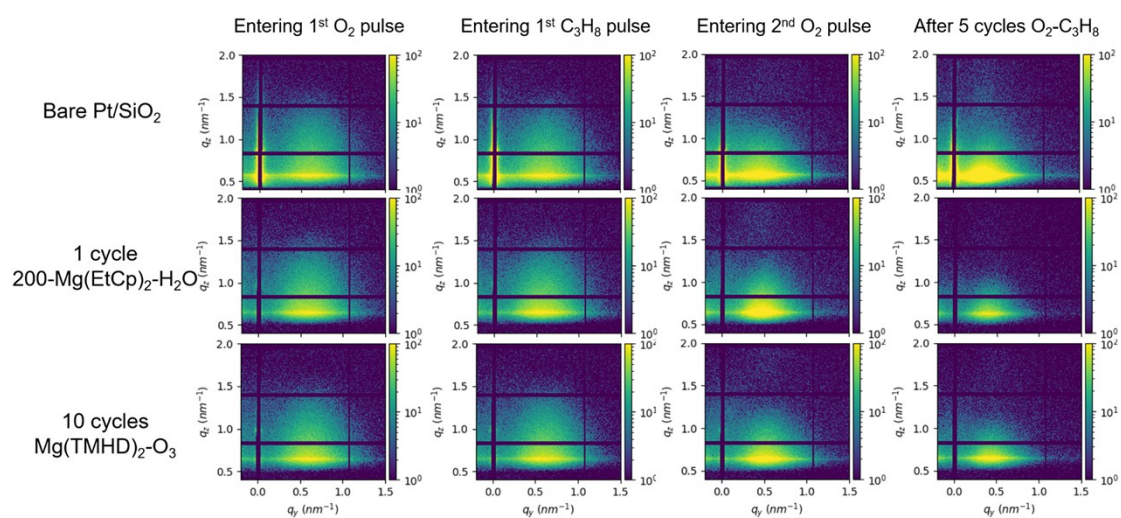

**Figure S19.** Selection of 2D in-situ GISAXS patterns recorded during five cycles of propane dehydrogenation reaction and reactivation in O<sub>2</sub> (20% O<sub>2</sub> in He) of bare Pt/SiO<sub>2</sub> and two MgO-coated Pt/SiO<sub>2</sub>, one synthesized with 1 Mg(EtCp)<sub>2</sub>-H<sub>2</sub>O ALD cycle at 200 °C and one synthesized with 10 Mg(TMHD)<sub>2</sub>-O<sub>3</sub> ALD cycles at 250 °C.

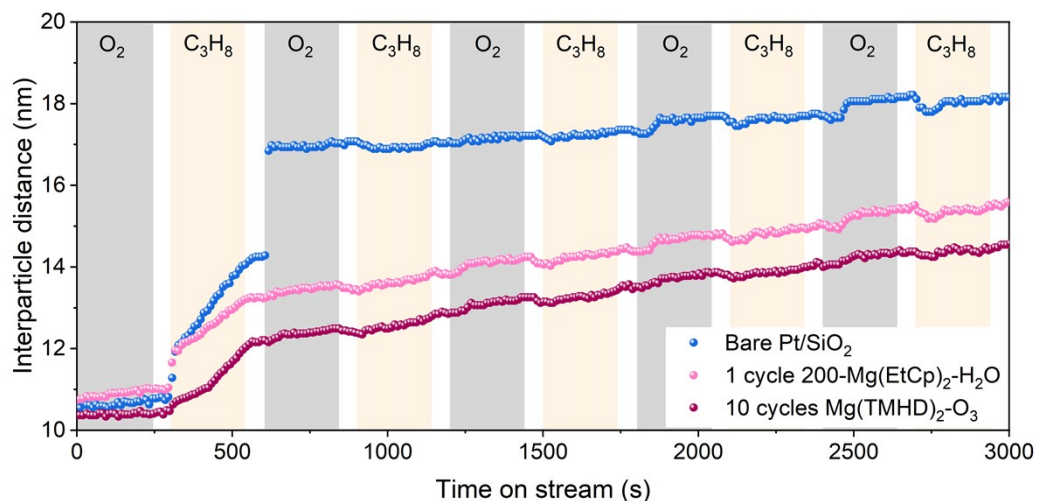

**Figure S20.** The evolution of interparticle distance during five cycles of propane dehydrogenation reaction (5% C<sub>3</sub>H<sub>8</sub> in He) and regeneration in O<sub>2</sub> (20% O<sub>2</sub> in He) at 600 °C, showing the evolution NPs spacing with time for three samples: bare Pt/SiO<sub>2</sub> and two MgO-coated Pt/SiO<sub>2</sub>, one synthesized with 1 Mg(EtCp)<sub>2</sub>-H<sub>2</sub>O ALD cycle at 200 °C and one synthesized with 10 Mg(TMHD)<sub>2</sub>-O<sub>3</sub> ALD cycles at 250 °C. The values are calculated from the in-situ record of  $q_{y,max}$  values.
